# Supplementary material for: An Estuarine Cyanophage S-CREM1 Encodes Three Distinct Antitoxin Genes and a Large Number of Non-Coding RNA Genes
Source: MDPI journal article supplement (doi:10.3390/v15020380), 2023-01-28
Supplement: s1 [file s1]

Table S1. Predicted ORFs in the S-CREM1 genome with homologs in the NCBI non-redundant (NR) database.

| ORF | Strand | Left | Right | aa length | Significant hit in NR database <sup>a</sup>                             | Putative function <sup>b</sup>            | E-value  | aa identity (%) | Conserved domain (E-value) <sup>c</sup> |
|-----|--------|------|-------|-----------|-------------------------------------------------------------------------|-------------------------------------------|----------|-----------------|-----------------------------------------|
| 1   | +      | 1    | 174   | 57        | hypothetical protein [ <i>Synechococcus</i> phage S-H38]                |                                           | 2.3E-14  | 50.9            |                                         |
| 2   | +      | 390  | 998   | 202       | virion structural protein [uncultured <i>Mediterranean</i> phage uvMED] |                                           | 2.2E-83  | 69.4            |                                         |
| 3   | +      | 1012 | 1374  | 120       | hypothetical protein [ <i>Synechococcus</i> phage S-H38]                |                                           | 1.5E-52  | 65              |                                         |
| 4   | +      | 1376 | 2008  | 214       | hypothetical protein [ <i>Synechococcus</i> phage S-H38]                |                                           | 2.8E-45  | 47.5            |                                         |
| 5   | +      | 2022 | 2456  | 144       | DNA primase subunit [ <i>Synechococcus</i> phage ACG-2014d]             |                                           | 1.5E-16  | 36.5            |                                         |
| 6   | +      | 2453 | 3451  | 332       | DNA primase subunit [ <i>Synechococcus</i> phage S-H38]                 | DNA primase subunit                       | 3.8E-155 | 63.9            | PHA02540 (1.9E-140)                     |
| 7   | +      | 3448 | 5760  | 770       | ribonucleotide reductase subunit A [ <i>Synechococcus</i> phage S-H38]  | ribonucleotide reductase subunit A (NrdA) | 0        | 81.8            | PHA02572 (0)                            |
| 8   | +      | 5771 | 6913  | 380       | ribonucleotide reductase subunit B [ <i>Synechococcus</i> phage S-H38]  | ribonucleotide reductase subunit B (NrdB) | 0        | 85.3            | PRK09101 (0)                            |
| 9   | +      | 6910 | 8091  | 393       | hypothetical protein [ <i>Synechococcus</i> phage S-PM2]                | lysozyme                                  | 1.9E-119 | 73.1            | cd00737 (3.8E-14)                       |
| 11  | +      | 8416 | 8847  | 143       | NAD synthetase [ <i>Synechococcus</i> phage ACG-2014d]                  | GIY-YIG endonuclease                      | 9.3E-74  | 74.8            | cd10444 (1.7E-14)                       |
| 12  | +      | 8898 | 9050  | 50        | hypothetical protein [ <i>Synechococcus</i> phage S-H38]                |                                           | 1.7E-08  | 66.7            |                                         |
| 13  | +      | 9149 | 9397  | 82        | hypothetical protein [ <i>Synechococcus</i>                             |                                           | 2.5E-41  | 77.5            |                                         |

|    |   |       |       |      |                                                                      |                                       |          |      |                    |
|----|---|-------|-------|------|----------------------------------------------------------------------|---------------------------------------|----------|------|--------------------|
|    |   |       |       |      | phage S-SKS1]                                                        |                                       |          |      |                    |
| 14 | + | 9390  | 9638  | 82   | hypothetical protein [ <i>Synechococcus</i><br>phage S-H38]          |                                       | 3.1E-14  | 63.5 |                    |
| 15 | + | 10664 | 10819 | 51   | hypothetical protein [ <i>Synechococcus</i><br>phage S-SRM01]        |                                       | 6.9E-07  | 52.9 |                    |
| 16 | + | 11050 | 11250 | 66   | hypothetical protein [ <i>Synechococcus</i><br>phage S-RIM2]         |                                       | 1.7E-19  | 68.9 |                    |
| 17 | + | 11247 | 11825 | 192  | hypothetical protein [ <i>Synechococcus</i><br>phage S-SRM01]        |                                       | 4.9E-99  | 73.9 |                    |
| 19 | + | 12232 | 12450 | 72   | high light inducible protein [ <i>Synechococcus</i><br>phage S-CBP4] | high light inducible<br>protein (Hli) | 3.7E-22  | 60.9 | PHA02337 (1.3E-13) |
| 20 | + | 12454 | 12963 | 169  | peroxiredoxin [ <i>Synechococcus</i> phage S-<br>SRM01]              | peroxiredoxin                         | 6.4E-69  | 61.3 | COG0678 (3.9E-72)  |
| 21 | + | 13104 | 14183 | 359  | photosystem II q(b) protein [ <i>Synechococcus</i><br>phage S-PM2]   | photosystem II<br>q(b) protein (PsbA) | 0        | 95.5 | TIGR01151 (0)      |
| 22 | + | 14262 | 17600 | 1112 | hypothetical protein [ <i>Synechococcus</i> phage<br>S-H38]          |                                       | 1.5E-73  | 39.7 |                    |
| 23 | + | 17614 | 17922 | 102  | hypothetical protein [ <i>Synechococcus</i> phage<br>ACG-2014d]      |                                       | 6.2E-07  | 40   |                    |
| 25 | + | 18277 | 18513 | 78   | glutaredoxin [ <i>Synechococcus</i> phage S-CAM9]                    | glutaredoxin                          | 1.9E-27  | 53.9 | cd03418 (3.8E-12)  |
| 26 | + | 18585 | 18827 | 80   | hypothetical protein [ <i>Synechococcus</i><br>phage S-H38]          |                                       | 9.7E-23  | 49.4 |                    |
| 27 | + | 18833 | 19708 | 291  | RNase H [ <i>Synechococcus</i> phage S-H38]                          | RNase H                               | 1.8E-163 | 75.3 | PHA0256 (2.8E-111) |
| 28 | + | 19710 | 20162 | 150  | hypothetical protein [ <i>Synechococcus</i><br>phage S-H38]          |                                       | 1.1E-88  | 82.7 |                    |
| 30 | + | 20413 | 20832 | 139  | hypothetical protein [ <i>Synechococcus</i>                          |                                       | 8.8E-41  | 58.3 |                    |

|    |   |       |       |     |                                                                                                      |                                               |          |      |                     |
|----|---|-------|-------|-----|------------------------------------------------------------------------------------------------------|-----------------------------------------------|----------|------|---------------------|
|    |   |       |       |     | phage S-SRM01]                                                                                       |                                               |          |      |                     |
| 31 | + | 20804 | 21091 | 95  | hypothetical protein [Cyanophage S-RIM14]                                                            |                                               | 5.4E-10  | 37.9 |                     |
| 32 | + | 21084 | 21773 | 229 | thymidylate synthase [ <i>Synechococcus</i> phage S-H25]                                             | thymidylate synthase (ThyX)                   | 3.9E-111 | 66.1 | PRK00847 (1.1E-77)  |
| 33 | + | 21773 | 21919 | 48  | hypothetical protein [ <i>Synechococcus</i> phage S-H38]                                             |                                               | 3.6E-17  | 72.9 |                     |
| 34 | + | 21932 | 22162 | 76  | hypothetical protein [Cyanophage S-RSM1]                                                             |                                               | 1.9E-39  | 81.6 |                     |
| 35 | + | 22164 | 22919 | 251 | phosphate starvation-inducible protein PhoH and related proteins [ <i>Synechococcus</i> phage S-H38] | phosphate starvation-inducible protein (PhoH) | 3.9E-161 | 83.3 | pfam02562 (1.2E-37) |
| 36 | + | 22919 | 23593 | 224 | exonuclease [ <i>Synechococcus</i> phage S-H38]                                                      | CRISPR/Cas system-associated protein Cas4     | 3.7E-115 | 72.6 | cd09637 (4.1E-05)   |
| 37 | + | 23583 | 23837 | 84  | gp33 late promoter transcription accessory protein [ <i>Synechococcus</i> phage metaG-MbCM1]         | late-transcription coactivator                | 7.5E-37  | 75.3 | pfam16805 (2.8E-22) |
| 38 | + | 23834 | 24445 | 203 | loader of DNA helicase [ <i>Synechococcus</i> phage S-H38]                                           | DNA helicase                                  | 3.3E-91  | 61.9 | PHA02559 (7.3E-60)  |
| 39 | + | 24442 | 24774 | 110 | hypothetical protein [ <i>Synechococcus</i> phage S-H38]                                             |                                               | 7.9E-46  | 69.2 |                     |
| 40 | + | 24808 | 25794 | 328 | single-stranded DNA binding protein [ <i>Synechococcus</i> phage S-H38]                              | single-stranded DNA binding protein           | 5.4E-175 | 83.2 | PHA02550 (2.1E-139) |
| 41 | - | 26492 | 25827 | 221 | baseplate wedge subunit [ <i>Synechococcus</i> phage S-H38]                                          | baseplate wedge subunit                       | 1.6E-47  | 40.6 | PHA02578 (4.1E-10)  |
| 42 | - | 27541 | 26495 | 348 | baseplate tail tube cap [ <i>Synechococcus</i> phage S-H38]                                          |                                               | 1.5E-77  | 42.5 |                     |
| 43 | - | 27996 | 27547 | 149 | head completion protein [ <i>Synechococcus</i> phage S-H38]                                          | head completion protein                       | 9.3E-78  | 77.1 | PHA02552 (6.7E-70)  |

|    |   |       |       |      |                                                                            |                                         |          |      |                      |
|----|---|-------|-------|------|----------------------------------------------------------------------------|-----------------------------------------|----------|------|----------------------|
|    |   |       |       |      | phage S-H38]                                                               |                                         |          |      |                      |
| 44 | + | 28036 | 28881 | 281  | structural protein [ <i>Synechococcus</i> phage S-P4]                      |                                         | 4.5E-31  | 36.9 |                      |
| 45 | + | 28926 | 29639 | 237  | baseplate hub subunit [ <i>Synechococcus</i> phage S-H38]                  | base plate protein                      | 9.9E-127 | 70.9 | pfam12322 (1.4E-15)  |
| 46 | + | 29669 | 29842 | 50   | baseplate hub assembly catalyst [ <i>Synechococcus</i> phage S-RIM8 A.HR1] |                                         | 1.2E-07  | 50   |                      |
| 47 | + | 29842 | 32892 | 1016 | hypothetical protein [ <i>Synechococcus</i> phage S-H9-2]                  | M15 family metalloproteinase            | 1.4E-51  | 68.9 | cd14814 (1.9E-18)    |
|    |   |       |       |      | M15 family metalloproteinase [ <i>Brevibacterium permense</i> ]            |                                         | 2.2E-26  | 54.5 |                      |
| 48 | + | 32965 | 35940 | 991  | lysozyme murein [ <i>Synechococcus</i> phage S-CAM22]                      |                                         | 4.8E-17  | 61.6 |                      |
| 49 | + | 35947 | 37284 | 445  | structural protein [Cyaphage S-RIM50]                                      |                                         | 2.4E-62  | 33.9 |                      |
| 50 | + | 37312 | 37524 | 70   | CP12 [uncultured <i>Mediterranean</i> phage uvMED]                         | CP12                                    | 7.4E-20  | 55.4 | smart01093 (1.1E-15) |
| 51 | + | 38173 | 38535 | 120  | rare lipoprotein A [ <i>Synechococcus</i> phage S-CBS4]                    | rare lipoprotein A                      | 8.3E-38  | 61.5 | cd22268 (1.3E-42)    |
| 52 | + | 38604 | 41090 | 828  | baseplate hub + tail lysozyme [ <i>Synechococcus</i> phage S-H38]          | baseplate hub subunit and tail lysozyme | 0        | 49.2 | COG5412 (5.4E-11)    |
| 53 | + | 41112 | 41339 | 75   | hypothetical protein [ <i>Synechococcus</i> phage S-H38]                   |                                         | 1.3E-14  | 45.8 |                      |
| 54 | + | 41336 | 41587 | 83   | hypothetical protein [ <i>Synechococcus</i> phage S-H38]                   |                                         | 2.7E-17  | 44.6 |                      |
| 55 | + | 41746 | 42096 | 116  | S-adesylmethionine decarboxylase [ <i>Synechococcus</i> phage S-H38]       | adesylmethionine decarboxylase (SpeD)   | 4.1E-50  | 66.4 | PRK02770 (4E-52)     |
| 56 | + | 42086 | 42304 | 72   | hypothetical protein [ <i>Synechococcus</i>                                |                                         | 4.4E-06  | 38.1 |                      |

|    |   |       |       |      |                                                                                                               |          |      |                                 |                      |
|----|---|-------|-------|------|---------------------------------------------------------------------------------------------------------------|----------|------|---------------------------------|----------------------|
|    |   |       |       |      | phage ACG-2014c]                                                                                              |          |      |                                 |                      |
| 57 | + | 42310 | 42579 | 89   | hypothetical protein [ <i>Synechococcus</i><br>phage S-SRM01]                                                 | 2.7E-39  | 71.3 |                                 |                      |
| 58 | + | 42670 | 43620 | 316  | hypothetical protein<br>[Lachnospiraceae bacterium]                                                           | 1.3E-11  | 29   |                                 |                      |
| 60 | + | 45198 | 45419 | 73   | hypothetical protein [Cytophagia bacterium]                                                                   | 1.1E-10  | 44.3 |                                 |                      |
| 61 | + | 45527 | 46831 | 434  | YadA domain protein [ <i>Synechococcus</i><br>phage ACG-2014c]                                                | 2.1E-122 | 47.1 |                                 |                      |
| 62 | + | 46839 | 48854 | 671  | structural protein [ <i>Synechococcus</i><br>phage S-WAM1]                                                    | 2.7E-68  | 32.7 |                                 |                      |
| 63 | + | 48880 | 52569 | 1229 | tail fiber protein [ <i>Synechococcus</i><br>phage S-H38]                                                     | 0        | 80.4 |                                 |                      |
| 64 | + | 52601 | 53536 | 311  | structural protein [ <i>Synechococcus</i><br>phage S-E7]                                                      | 2.3E-30  | 46.5 |                                 |                      |
| 65 | + | 53542 | 54438 | 298  | keratin, type I cytoskeletal 9 [ <i>Lingula anatina</i> ]                                                     | 1.2E-20  | 47   |                                 |                      |
| 66 |   | 54494 | 54862 | 122  | tail fiber protein [ <i>Synechococcus</i><br>phage S-WAM1]                                                    | 5E-13    | 0.5  |                                 |                      |
| 67 | + | 55301 | 56104 | 267  | tail fiber protein [ <i>Synechococcus</i><br>phage S-WAM1]                                                    | 6.6E-52  | 49.1 |                                 |                      |
| 68 | + | 56135 | 56623 | 162  | gp40 [ <i>Synechococcus</i> phage syn9]                                                                       | 6.2E-05  | 56.4 |                                 |                      |
| 69 | + | 56663 | 58267 | 534  | putative tryptophan halogenase<br>[ <i>Synechococcus</i> phage syn9]                                          | 0        | 60.3 | tryptophan halogenase<br>(PrnA) | pfam04820 (4.8E-105) |
| 70 | + | 58331 | 59068 | 245  | putative Deoxyuridine 5'-triphosphate<br>nucleotidohydrolase [uncultured<br><i>Mediterranean</i> phage uvMED] | 1E-11    | 28.8 |                                 |                      |
| 71 | + | 59065 | 59286 | 73   | gp44 clamp loader subunit [ <i>Synechococcus</i>                                                              | 2.7E-29  | 73.9 |                                 |                      |

|    |   |       |       |     |                                                                                                       |                                        |          |      |                     |
|----|---|-------|-------|-----|-------------------------------------------------------------------------------------------------------|----------------------------------------|----------|------|---------------------|
|    |   |       |       |     | phage syn9]                                                                                           |                                        |          |      |                     |
| 72 | + | 59290 | 59889 | 199 | 2OG-Fe(II) oxygenase family protein<br>[ <i>Caulobacter</i> sp. S45]                                  | 2OG-Fe(II) oxygenase<br>family protein | 1.7E-09  | 35.9 | pfam13759 (6.4E-14) |
| 73 | + | 59891 | 60673 | 260 | gp46 [ <i>Synechococcus</i> phage syn9]                                                               |                                        | 5.1E-89  | 49.2 |                     |
| 74 | + | 60670 | 61209 | 179 | gp47 [ <i>Synechococcus</i> phage syn9]                                                               | 2OG-Fe(II) oxygenase<br>family protein | 4.9E-75  | 60.4 | pfam13759 (8.3E-05) |
|    |   |       |       |     | 2OG-Fe(II) oxygenase family protein<br>[ <i>Stappia stellulata</i> ]                                  |                                        | 1.5E-05  | 27   |                     |
| 75 | + | 61206 | 61790 | 194 | 2OG-Fe(II) oxygenase superfamily domain<br>containing protein [ <i>Synechococcus</i><br>phage S-WAM1] | 2OG-Fe(II) oxygenase<br>family protein | 5.9E-32  | 38.1 | TIGR02466 (2.5E-31) |
| 76 | + | 61783 | 62493 | 236 | JmjC domain containing protein<br>[uncultured Caudovirales phage]                                     | ribosomal protein<br>hydroxylase       | 2.3E-106 | 61.2 | COG2850 (2.7E-04)   |
| 77 | + | 62486 | 63052 | 188 | Prolyl 4-hydroxylase alpha subunit<br>homologue [uncultured <i>Mediterranean</i><br>phage uvMED]      |                                        | 4.3E-23  | 31.4 |                     |
| 79 | + | 63663 | 64256 | 197 | gp53 [ <i>Synechococcus</i> phage syn9]                                                               |                                        | 2.1E-78  | 59.6 |                     |
|    |   |       |       |     | 2OG-Fe(II) oxygenase [ <i>Betaproteobacteria</i><br>bacterium]                                        |                                        | 1.9E-21  | 31   |                     |
| 80 | + | 64253 | 64780 | 175 | gp54 [ <i>Synechococcus</i> phage syn9]                                                               |                                        | 5.6E-73  | 60.8 |                     |
|    |   |       |       |     | 2OG-Fe(II) oxygenase [ <i>Betaproteobacteria</i><br>bacterium]                                        |                                        | 6.7E-27  | 36.4 |                     |
| 82 | + | 65149 | 65313 | 54  | hypothetical protein [ <i>Synechococcus</i><br>phage S-H38]                                           |                                        | 3.3E-09  | 52.4 |                     |
| 84 | + | 65488 | 65739 | 83  | hypothetical protein [ <i>Synechococcus</i><br>phage S-H38]                                           |                                        | 3.3E-12  | 48.5 |                     |

|     |   |       |       |     |                                                                                        |                                     |         |      |                     |
|-----|---|-------|-------|-----|----------------------------------------------------------------------------------------|-------------------------------------|---------|------|---------------------|
| 86  | + | 65930 | 66115 | 61  | hypothetical protein [Bacterium]                                                       |                                     | 1E-11   | 54.1 |                     |
| 87  | + | 66130 | 66348 | 72  | putative membrane protein<br>[ <i>Synechococcus</i> sp. ROS8604]                       |                                     | 9.6E-06 | 39.4 |                     |
| 88  | + | 66351 | 66557 | 68  | putative 2OG-Fe(II) oxygenase<br>[ <i>Synechococcus</i> phage S-SCSM1]                 |                                     | 3.1E-11 | 47.6 |                     |
| 89  | + | 66719 | 66898 | 59  | hypothetical protein [Bacterium]                                                       |                                     | 6.6E-15 | 62.8 |                     |
| 91  | + | 67025 | 67549 | 174 | hypothetical protein [ <i>Synechococcus</i> phage<br>ACG-2014f]                        | pyrimidine dimer DNA<br>glycosylase | 1E-78   | 64   | pfam03013 (8.4E-11) |
|     |   |       |       |     | pyrimidine dimer DNA<br>glycosylase/endonuclease V<br>[ <i>Nonlabens xiamenensis</i> ] |                                     | 1.2E-66 | 58.1 |                     |
| 92  | + | 67546 | 67737 |     | hypothetical protein [ <i>Synechococcus</i><br>phage SynMITS9220M01]                   |                                     | 1.2E-06 | 48.8 |                     |
| 93  | + | 67881 | 68111 |     | hypothetical protein [ <i>Synechococcus</i><br>phage S-PM2]                            |                                     | 1.6E-17 | 55.6 |                     |
| 94  | + | 68262 | 68561 |     | hypothetical protein [ <i>Synechococcus</i><br>phage S-SSM7]                           |                                     | 4.8E-19 | 52.7 |                     |
| 95  | + | 68539 | 68958 |     | hypothetical protein [ <i>Synechococcus</i><br>phage S-CBWM1]                          |                                     | 2.1E-08 | 33.7 |                     |
| 97  | + | 69257 | 69451 |     | hypothetical protein [ <i>Synechococcus</i><br>phage S-PM2]                            |                                     | 1.9E-07 | 53.1 |                     |
| 98  | + | 69444 | 69671 |     | hypothetical protein [ <i>Synechococcus</i><br>phage S-SRM01]                          |                                     | 2.4E-07 | 42.4 |                     |
| 100 | + | 69856 | 70032 | 58  | hypothetical protein [Bacterium]                                                       |                                     | 1E-03   | 45.3 |                     |
| 101 | + | 70055 | 70240 | 61  | hypothetical protein [ <i>Synechococcus</i><br>phage S-SRM01]                          |                                     | 4.5E-15 | 56.9 |                     |

|     |   |       |       |     |                                                              |            |          |      |                    |
|-----|---|-------|-------|-----|--------------------------------------------------------------|------------|----------|------|--------------------|
| 103 | + | 70439 | 70633 | 64  | hypothetical protein [ <i>Synechococcus</i> phage B3]        |            | 6.3E-09  | 40.3 |                    |
| 104 | + | 70630 | 70836 | 68  | hypothetical protein [ <i>Synechococcus</i> phage S-SRM01]   |            | 1.1E-11  | 52.3 |                    |
| 105 | + | 70833 | 71078 | 81  | hypothetical protein [ <i>Synechococcus</i> phage S-SRM01]   |            | 1.6E-06  | 34.5 |                    |
| 106 | + | 71163 | 71441 | 103 | hypothetical protein [ <i>Synechococcus</i> phage S-SRM01]   |            | 1.3E-18  | 52   |                    |
| 108 | + | 71896 | 72117 | 73  | hypothetical protein [ <i>Synechococcus</i> phage S-PM2]     |            | 4.8E-14  | 75   |                    |
|     |   |       |       |     | transmembrane protein [ <i>Siphoviridae</i> sp.]             |            | 1.4E-17  | 66.1 |                    |
| 109 | + | 72114 | 72353 | 79  | hypothetical protein [ <i>Synechococcus</i> phage S-SRM01]   |            | 8.7E-20  | 60.3 |                    |
| 110 | + | 72350 | 72541 | 63  | hypothetical protein [Cyanophage S-RIM50]                    |            | 8E-13    | 51.6 |                    |
| 111 | + | 72538 | 72717 | 59  | hypothetical protein [ <i>Synechococcus</i> phage S-SRM01]   |            | 7.6E-23  | 92   |                    |
| 112 | + | 72714 | 73007 | 97  | hypothetical protein [ <i>Synechococcus</i> phage S-SRM01]   |            | 4.4E-09  | 42.4 |                    |
| 113 | + | 73004 | 74086 | 360 | RNA ligase [uncultured Caudovirales phage]                   | RNA ligase | 5.7E-120 | 55.3 | PHA02142 (6.2E-78) |
| 114 | + | 74098 | 74334 | 78  | hypothetical protein [ <i>Synechococcus</i> phage S-SRM01]   |            | 1.6E-18  | 59.2 |                    |
| 116 | + | 74501 | 74896 | 131 | hypothetical protein [ <i>Synechococcus</i> phage S-PM2]     |            | 1.3E-71  | 78.3 |                    |
| 117 | + | 74896 | 75213 | 105 | hypothetical protein [ <i>Synechococcus</i> phage ACG-2014f] |            | 4.8E-08  | 51.2 |                    |
| 118 | + | 75269 | 75454 | 61  | hypothetical protein [ <i>Synechococcus</i>                  |            | 1.1E-10  | 63.4 |                    |



|     |   |       |       |     |                                                                             |          |      |                     |
|-----|---|-------|-------|-----|-----------------------------------------------------------------------------|----------|------|---------------------|
|     |   |       |       |     | phage S-H25]                                                                |          |      |                     |
| 121 | + | 76180 | 76413 | 77  | hypothetical protein [ <i>Synechococcus</i><br>phage S-PM2]                 | 4.2E-24  | 65.7 |                     |
| 123 | + | 76849 | 77211 | 120 | hypothetical protein [ <i>Synechococcus</i> phage<br>S-H38]                 | 1.5E-17  | 42.5 |                     |
| 124 | + | 77211 | 77753 | 180 | hypothetical protein [ <i>Synechococcus</i> phage S-<br>CAM9]               | 2.8E-59  | 55.8 |                     |
| 125 | + | 77873 | 78976 | 367 | hypothetical protein [Cyanophage S-RIM44]                                   | 3.6E-130 | 50.3 |                     |
| 126 | + | 79042 | 79953 | 303 | hypothetical protein [ <i>Synechococcus</i> phage<br>S-H38]                 | 6.1E-112 | 53.4 |                     |
|     |   |       |       |     | site-specific DNA-methyltransferase<br>[ <i>Caulobacteraceae</i> bacterium] | 1E-57    | 41.4 |                     |
| 128 | + | 80276 | 80404 | 42  | hypothetical protein [ <i>Synechococcus</i><br>phage S-SRM01]               | 7.8E-12  | 66.7 |                     |
| 129 | + | 80413 | 80685 | 90  | hypothetical protein [ <i>Synechococcus</i><br>phage B3]                    | 8.5E-29  | 59.3 |                     |
| 131 | + | 80872 | 81690 | 272 | hypothetical protein [ <i>Synechococcus</i><br>phage B3]                    | 3.4E-116 | 62.7 | pfam01145 (4.7E-16) |
|     |   |       |       |     | SPFH domain-containing protein<br>[ <i>Nitrospinae</i> bacterium]           | 4.4E-25  | 32.1 |                     |
| 132 | + | 81780 | 82016 | 78  | hypothetical protein [ <i>Synechococcus</i><br>phage S-CBM2]                | 1.8E-17  | 52.6 |                     |
| 133 | + | 82099 | 82293 | 64  | hypothetical protein [ <i>Synechococcus</i><br>phage S-CBM2]                | 1.4E-15  | 50   |                     |
| 134 | + | 82293 | 82499 | 68  | putative membrane protein<br>[ <i>Synechococcus</i> sp. A15-127]            | 3.5E-07  | 33.3 |                     |

|     |   |       |       |     |                                                                                     |                      |         |      |                     |
|-----|---|-------|-------|-----|-------------------------------------------------------------------------------------|----------------------|---------|------|---------------------|
| 135 | + | 82496 | 82771 | 91  | hypothetical protein [ <i>Synechococcus</i> phage S-SRM01]                          |                      | 6.8E-28 | 60.5 |                     |
| 136 | + | 82768 | 83388 | 206 | hypothetical protein [ <i>Synechococcus</i> phage S-WAM1]                           | 2OG-Fe(II) oxygenase | 1.3E-14 | 30.5 | pfam13759 (1.3E-12) |
|     |   |       |       |     | 2OG-Fe(II) oxygenase family protein [ <i>Stemitos rutilans</i> HA7619-LM2]          |                      | 1.7E-09 | 33.3 |                     |
| 137 | + | 83426 | 84685 | 419 | DNA helicase [ <i>Synechococcus</i> phage S-H38]                                    | DNA helicase         | 0       | 78.5 | COG1061 (2.1E-22)   |
| 138 | + | 84941 | 85102 | 53  | hypothetical protein [Cyanophage P-RSM1]                                            |                      | 6.1E-08 | 51   |                     |
| 139 | + | 85106 | 85267 | 53  | hypothetical protein [ <i>Synechococcus</i> phage S-RIM8 A.HR1]                     |                      | 1.5E-26 | 88.7 |                     |
| 140 | + | 85271 | 85468 | 65  | hypothetical protein [Cyanophage S-RIM50]                                           |                      | 1.7E-31 | 86.4 |                     |
| 141 | + | 85465 | 85647 | 60  | hypothetical protein [ <i>Synechococcus</i> phage S-CBM2]                           |                      | 8.8E-11 | 45.5 |                     |
| 143 | + | 85896 | 86174 | 92  | hypothetical protein [Bacterium]                                                    |                      | 2E-12   | 37.6 |                     |
| 145 | + | 86335 | 86466 | 43  | hypothetical protein [ <i>Synechococcus</i> phage S-SRM01]                          |                      | 1.5E-04 | 47.6 |                     |
| 146 | + | 86596 | 86850 | 84  | hypothetical protein [ <i>Synechococcus</i> phage ACG-2014d]                        |                      | 1.1E-27 | 61.4 |                     |
| 147 | + | 86879 | 87094 | 71  | hypothetical protein [ <i>Synechococcus</i> phage S-CBM2]                           |                      | 7.1E-28 | 71.8 |                     |
| 149 | + | 87348 | 87602 | 84  | hypothetical protein [ <i>Synechococcus</i> phage Bellamy]                          |                      | 4.9E-08 | 42.7 |                     |
| 151 | + | 88076 | 88393 | 105 | hypothetical protein [ <i>Synechococcus</i> phage S-CBM2]                           |                      | 7.3E-46 | 68.8 |                     |
| 155 | + | 89516 | 89680 | 54  | AbrB/MazE/SpoVT family DNA-binding domain-containing protein [ <i>Cyabacteria</i> ] |                      | 4.3E-06 | 39.6 |                     |

|     |   |        |        |      |                                                                             |                                         |         |      |                     |
|-----|---|--------|--------|------|-----------------------------------------------------------------------------|-----------------------------------------|---------|------|---------------------|
|     |   |        |        |      | bacterium REEB444]                                                          |                                         |         |      |                     |
| 156 | + | 89733  | 90080  | 115  | hypothetical protein [ <i>Synechococcus</i><br>phage S-H38]                 |                                         | 1.2E-27 | 50.9 |                     |
| 157 | + | 90084  | 94295  | 1403 | hypothetical protein [ <i>Synechococcus</i><br>phage S-H38]                 |                                         | 8.1E-89 | 33.6 |                     |
| 158 | + | 94295  | 94816  | 173  | structural protein [ <i>Synechococcus</i> phage S-P4]                       |                                         | 1.1E-09 | 32.4 |                     |
| 159 | + | 94863  | 95003  | 46   | hypothetical protein [ <i>Synechococcus</i><br>phage S-H25]                 |                                         | 1E-13   | 73.9 |                     |
| 160 | + | 95130  | 95309  | 59   | hypothetical protein [ <i>Synechococcus</i><br>phage S-H35]                 |                                         | 5.2E-11 | 56.3 |                     |
| 161 | + | 95356  | 95775  | 139  | baseplate wedge subunit [ <i>Synechococcus</i><br>phage S-H38]              | baseplate wedge subunit                 | 4.3E-38 | 49.6 | PHA00415 (3.4E-37)  |
| 162 | + | 95775  | 98180  | 801  | baseplate wedge subunit [ <i>Synechococcus</i><br>phage S-H38]              | baseplate wedge subunit                 | 0       | 55.8 | PHA02553 (9.1E-148) |
| 163 | + | 98218  | 114486 | 5422 | baseplate wedge initiator [ <i>Synechococcus</i><br>phage S-H38]            | baseplate wedge                         | 0       | 52.9 | pfam14240 (2.3E-28) |
| 164 | + | 114518 | 115843 | 441  | baseplate wedge subunit and tail pin<br>[ <i>Synechococcus</i> phage S-H38] | baseplate wedge subunit<br>and tail pin | 6.6E-50 | 39.7 | PHA02582 (2.1E-08)  |
| 165 | + | 115845 | 117524 | 559  | subtilisin-like serine protease [ <i>Synechococcus</i><br>phage S-H38]      | peptidase S8 family<br>domain           | 0       | 58   | cd04077 (4.4E-34)   |
| 166 | + | 117529 | 119637 | 702  | baseplate wedge initiator [ <i>Synechococcus</i><br>phage S-H38]            |                                         | 0       | 60.7 |                     |
| 167 | + | 119683 | 121215 | 510  | baseplate wedge protein [ <i>Synechococcus</i><br>phage S-H38]              | baseplate wedge protein                 | 0       | 82.8 | pfam09215 (2.6E-07) |
| 168 | + | 121233 | 128495 | 2420 | VrlC protein [ <i>Synechococcus</i> phage S-H35]                            |                                         | 0       | 49   |                     |
| 169 | + | 128495 | 128737 | 80   | hypothetical protein [ <i>Synechococcus</i>                                 |                                         | 2.6E-14 | 51.4 |                     |

|     |   |        |        |      |                                                                                       |                                                  |          |      |                    |
|-----|---|--------|--------|------|---------------------------------------------------------------------------------------|--------------------------------------------------|----------|------|--------------------|
|     |   |        |        |      | phage S-SCSM1]                                                                        |                                                  |          |      |                    |
| 170 | + | 128727 | 128924 | 65   | hypothetical protein [ <i>Synechococcus</i><br>phage S-H38]                           |                                                  | 4E-14    | 66   |                    |
| 171 | + | 129018 | 133772 | 1584 | tail fiber protein [ <i>Synechococcus</i><br>phage S-H38]                             | tail fiber                                       | 0        | 60.4 | c133689 (1.6E-10)  |
| 172 | + | 133785 | 134591 | 268  | neck protein [ <i>Synechococcus</i> phage S-SSM4]                                     | neck protein                                     | 8.9E-130 | 65.3 | PHA02554 (7.4E-88) |
| 173 | + | 134596 | 135504 | 302  | neck protein [ <i>Synechococcus</i> phage S-H38]                                      | neck protein                                     | 1.5E-108 | 67.7 | PHA02555 (3.7E-72) |
| 174 | + | 135504 | 136307 | 267  | tail sheath stabilizer and completion protein<br>[ <i>Synechococcus</i> phage S-SSM5] | tail sheath stabilizer and<br>completion protein | 8.6E-115 | 60.7 | PHA02556 (1.5E-82) |
| 175 | + | 136304 | 136723 | 139  | terminase small subunit [ <i>Synechococcus</i><br>phage S-H38]                        | terminase small subunit<br>(TerS)                | 1.2E-65  | 74.1 | PHA02585 (2.2E-10) |
| 176 | + | 136756 | 137280 | 174  | YadA domain structural protein<br>[ <i>Synechococcus</i> phage S-P4]                  |                                                  | 2.7E-51  | 55.6 |                    |
| 177 | + | 137282 | 137611 | 109  | hypothetical protein [ <i>Synechococcus</i><br>phage S-H38]                           |                                                  | 1.2E-52  | 72.7 |                    |
| 178 | + | 137615 | 138889 | 424  | virion structural protein [Cyanophage<br>S-RIM12]                                     |                                                  | 0        | 69.3 |                    |
| 179 | + | 138886 | 139161 | 91   | structural protein [ <i>Synechococcus</i> phage S-P4]                                 |                                                  | 2.6E-41  | 81.3 |                    |
| 180 | + | 139161 | 139319 | 52   | hypothetical protein [uncultured<br>Mediterranean phage uvMED]                        |                                                  | 3E-09    | 55.8 |                    |
| 181 | + | 139306 | 140955 | 549  | terminase large subunit [ <i>Synechococcus</i><br>phage S-H38]                        | terminase large subunit<br>(TerL)                | 0        | 87   | PHA02533 (0)       |
| 182 | + | 141019 | 143259 | 746  | tail sheath momer [ <i>Synechococcus</i><br>phage S-H38]                              | tail sheath protein                              | 0        | 63.7 | PHA02539 (0)       |
| 183 | + | 143298 | 144032 | 244  | tail tube momer protein [ <i>Synechococcus</i><br>phage S-H38]                        | tail tube protein                                | 1E-70    | 54.2 | PHA02551 (2.9E-63) |

|     |   |        |        |     |                                                                           |                                                              |          |      |                     |
|-----|---|--------|--------|-----|---------------------------------------------------------------------------|--------------------------------------------------------------|----------|------|---------------------|
| 184 | + | 144081 | 145727 | 548 | portal vertex protein [ <i>Synechococcus</i> phage S-H38]                 | portal vertex protein                                        | 0        | 80.4 | PHA02531 (0)        |
| 185 | + | 145755 | 145922 | 55  | hypothetical protein [ <i>Synechococcus</i> phage S-H38]                  |                                                              | 9.7E-09  | 54.6 |                     |
| 186 | + | 145922 | 146569 | 215 | prohead core scaffold protein [ <i>Synechococcus</i> phage S-H38]         | prohead core protein<br>serine protease                      | 3.8E-126 | 82.3 | PHA00911 (4.9E-88)  |
| 187 | + | 146632 | 147666 | 344 | prohead core scaffold protein [ <i>Synechococcus</i> phage S-H38]         | prohead core protein                                         | 4.7E-152 | 69.9 | PHA02557 (3.7E-67)  |
| 188 | + | 147733 | 149091 | 452 | major capsid protein [ <i>Synechococcus</i> phage S-H38]                  | major capsid protein                                         | 0        | 89.9 | PHA02541 (0)        |
| 189 | + | 149173 | 149760 | 195 | tail completion and sheath stabilizer [ <i>Synechococcus</i> phage S-H38] | tail completion and sheath<br>stabilizer                     | 2.3E-76  | 56.2 | PHA02576 (7.8E-11)  |
| 190 | + | 149788 | 150216 | 142 | single-stranded DNA binding protein [ <i>Synechococcus</i> phage S-H38]   | recombination, repair and<br>ssDNA binding protein<br>(UvsY) | 1E-86    | 87.3 | pfam11056 (3.6E-40) |
| 191 | + | 150218 | 151693 | 491 | RNA-DNA + DNA-DNA helicase [ <i>Synechococcus</i> phage S-H38]            | UvsW helicase                                                | 0        | 82.5 | PHA02558 (0)        |
| 192 | + | 151686 | 152120 | 144 | methylamine utilization protein [ <i>Synechococcus</i> phage S-H38]       | RNA-binding protein                                          | 1.7E-45  | 54.9 | pfam16243 (1.5E-25) |
| 193 | + | 152240 | 152707 | 155 | RNA polymerase sigma factor for late transcription [Cyaphage S-RIM4]      | RNA polymerase                                               | 3.2E-83  | 76.6 | PHA02547 (2.7E-65)  |
| 194 | + | 152711 | 153745 | 344 | recombination endonuclease [ <i>Synechococcus</i> phage S-H38]            | recombination<br>endonuclease                                | 0        | 70.9 | PHA02546 (1.5E-150) |
| 195 | + | 153745 | 153996 | 83  | hypothetical protein [ <i>Synechococcus</i> phage S-H38]                  |                                                              | 1.1E-34  | 66.3 |                     |
| 196 | + | 153993 | 155711 | 572 | recombination endonuclease [ <i>Synechococcus</i> phage S-H38]            | recombination                                                | 0        | 64   | PHA02562 (0)        |

|     |   |        |        |     |                                                                                                |                                                      |          |      |                     |
|-----|---|--------|--------|-----|------------------------------------------------------------------------------------------------|------------------------------------------------------|----------|------|---------------------|
|     |   |        |        |     | phage S-H38]                                                                                   | endonuclease                                         |          |      |                     |
| 197 | + | 155929 | 158070 | 713 | peptidase [ <i>Synechococcus</i> phage S-H38]                                                  |                                                      | 0        | 52.4 |                     |
| 198 | + | 158135 | 159214 | 359 | MoxR family ATPase [ <i>Actinomyces</i> bacterium]                                             | MoxR family ATPase                                   | 0        | 73.4 | cl34016 (1.4E-23)   |
|     |   |        |        |     | cobalamin biosynthesis protein<br>[ <i>Synechococcus</i> phage S-H38]                          |                                                      | 6.6E-179 | 69.6 |                     |
| 199 | + | 159277 | 160155 | 292 | S-layer homology domain-containing protein<br>[ <i>Synechococcus</i> phage S-PM2]              | iron uptake porin                                    | 2.2E-116 | 65.5 | NF033921 (5.1E-28)  |
| 200 | + | 160213 | 160521 | 102 | peptidase [ <i>Synechococcus</i> phage B3]                                                     |                                                      | 7E-53    | 80.8 |                     |
| 201 | + | 160524 | 161198 | 224 | sliding clamp DNA polymerase accessory<br>protein [ <i>Synechococcus</i> phage S-H38]          | sliding clamp DNA<br>polymerase accessory<br>protein | 3.4E-84  | 55.4 | PHA02545 (1.9E-77)  |
| 202 | + | 161223 | 162167 | 314 | DNA polymerase clamp loader small subunit<br>[ <i>Synechococcus</i> phage S-H38]               | DNA polymerase clamp<br>loader small subunit         | 1.7E-176 | 74.2 | PHA02544 (8.3E-159) |
| 203 | + | 162171 | 163229 | 352 | putative cytoplasmic protein [ <i>Synechococcus</i><br>phage S-SRM01]                          |                                                      | 0        | 82.1 |                     |
| 204 | + | 163226 | 163609 | 127 | DNA polymerase [ <i>Synechococcus</i> phage S-<br>H38]                                         | clamp loader small<br>subunit                        | 5.2E-61  | 72.8 | PHA02593 (1.5E-10)  |
| 205 | + | 163606 | 164031 | 141 | translation repressor protein [bacterium]                                                      | translation repressor<br>protein                     | 1.3E-86  | 89   | PHA02543 (9.6E-77)  |
|     |   |        |        |     | endoribonuclease translational repressor of<br>early genes [ <i>Synechococcus</i> phage S-H38] |                                                      | 1.5E-84  | 85.7 |                     |
| 207 | - | 164524 | 164372 | 50  | hypothetical protein [Cyanobacteria bacterium<br>M_surface_10_m1_298]                          |                                                      | 3.2E-04  | 44   |                     |
| 209 | + | 164906 | 165358 | 150 | heat shock protein; molecular chaperone IbpA<br>[ <i>Synechococcus</i> phage S-H38]            | heat shock protein (Hsp)                             | 2.4E-68  | 66.7 | PRK10743 (5.3E-32)  |
| 210 | + | 165431 | 165661 | 76  | hypothetical protein [ <i>Synechococcus</i> ]                                                  |                                                      | 3.4E-28  | 60.5 |                     |

|     |   |        |        |     |                                                              |                                                                             |          |      |                      |
|-----|---|--------|--------|-----|--------------------------------------------------------------|-----------------------------------------------------------------------------|----------|------|----------------------|
|     |   |        |        |     | phage S-H38]                                                 |                                                                             |          |      |                      |
| 211 | + | 165958 | 166353 | 131 | hypothetical protein [ <i>Synechococcus</i><br>phage S-H38]  |                                                                             | 1.3E-25  | 41.6 |                      |
| 212 | + | 166350 | 168839 | 829 | DNA polymerase [ <i>Synechococcus</i><br>phage S-H38]        | DNA polymerase                                                              | 0        | 79.1 | PHA02528 (0)         |
| 213 | + | 168836 | 169891 | 351 | recombination protein [ <i>Synechococcus</i><br>phage S-H38] | recombination protein                                                       | 0        | 89.5 | COG0468 (6.3E-24)    |
| 214 | + | 169869 | 170450 | 178 | 2OG-Fe(II) oxygenase [ <i>Synechococcus</i><br>phage S-H38]  | 2OG-Fe(II) oxygenase<br>family protein                                      | 1.6E-57  | 50   | smart00702 (3.5E-16) |
| 215 | + | 170450 | 171832 | 460 | DNA primase/helicase [ <i>Synechococcus</i><br>phage S-H38]  | DNA helicase                                                                | 0        | 83   | PHA02542 (0)         |
| 216 | + | 171841 | 172299 | 152 | pyrophosphatase [ <i>Synechococcus</i><br>phage S-H38]       | pyrophosphatase (MazG)                                                      | 6.7E-68  | 68.8 | cd11541 (8.3E-24)    |
| 217 | + | 172391 | 173701 | 436 | hypothetical protein [ <i>Synechococcus</i><br>phage S-CBM2] |                                                                             | 1.4E-162 | 60.9 |                      |
| 218 | + | 173735 | 174868 | 377 | cytidyltransferase [ <i>Synechococcus</i><br>phage S-H38]    | nicotinamide/nicotinate<br>mononucleotide<br>adenylyltransferase<br>(NMNAT) | 0        | 71.9 | cd02167 (6.3E-06)    |
| 219 | + | 174901 | 177252 | 783 | hypothetical protein [ <i>Synechococcus</i><br>phage S-H38]  |                                                                             | 8.3E-49  | 44   |                      |
| 220 | + | 177263 | 177910 | 215 | hypothetical protein [ <i>Synechococcus</i><br>phage S-H25]  |                                                                             | 9.2E-34  | 63.3 |                      |

<sup>a</sup>The top and additional homologs for each organism type are displayed based on BLASTP against the non-redundant database.

<sup>b</sup>Putative functions are predicted based on functions of homologs from the Conserved Domain Database.

<sup>c</sup>The best hit of each ORF in the Conserved Domain Database and the corresponding e-value.

Table S2. Predicted ORFs in the S-CREM1 genome with distant homologs detected by using HHpred and Phyre2 search.

| OR<br>F | Stran<br>d | Left  | Right | aa<br>length | Putative function <sup>a</sup>    | HHpred search                                                          |                    |         | Phyre2 search                                                                                  |                   |                 |
|---------|------------|-------|-------|--------------|-----------------------------------|------------------------------------------------------------------------|--------------------|---------|------------------------------------------------------------------------------------------------|-------------------|-----------------|
|         |            |       |       |              |                                   | Hits                                                                   | Probability<br>(%) | E-value | Hits                                                                                           | Confidence<br>(%) | Identity<br>(%) |
| 2       | +          | 390   | 998   | 202          | cell adhesion                     | no hit                                                                 |                    |         | immunoglobulin superfamily;<br>fibronectin; membrane protein,<br>cell adhesion                 | 99.9              | 21              |
| 5       | +          | 2022  | 2456  | 144          | holin-like protein                | holin-like protein [ <i>Bacillus</i><br>phage SPP1]                    | 97.8               | 2.6E-03 | no hit                                                                                         |                   |                 |
| 12      | +          | 8898  | 9050  | 50           | UvrB                              | UvrB; DNA excision repair<br>[ <i>Bacillus subtilis</i> ]              | 96                 | 9.4E-02 | no hit                                                                                         |                   |                 |
| 16      | +          | 11050 | 11250 | 66           | pre-mRNA-splicing<br>factor       | no hit                                                                 |                    |         | pre-mRNA-splicing factor 38<br>[ <i>Chaetomium thermophilum</i> var.<br>thermophilum DSM 1495] | 83.4              | 25              |
| 22      | +          | 14262 | 17600 | 1112         | collagen-like protein             | collagen-like protein<br>[ <i>Acanthamoeba polyphaga</i><br>mimivirus] | 96.3               | 2.2E-02 | no hit                                                                                         |                   |                 |
| 28      | +          | 19710 | 20162 | 150          | DNA ligase                        | DNA ligase [ <i>Enterobacteria</i><br>phage T4]                        | 100                | 1.3E-28 | no hit                                                                                         |                   |                 |
| 33      | +          | 21773 | 21919 | 48           | recombination<br>endonuclease VII | recombination endonuclease VII<br>[Bacteriophage T4]                   | 91.3               | 1.7     | no hit                                                                                         |                   |                 |
| 42      | -          | 27541 | 26495 | 348          | baseplate tail tube               | baseplate-tail tube<br>[ <i>Enterobacteria</i> phage T4]               | 100                | 6.2E-42 | baseplate [ <i>Serratia entomophila</i> ]                                                      | 86                | 13              |
| 44      | +          | 28036 | 28881 | 281          | tail tube protein                 | tail tube protein [ <i>Serratia</i> phage<br>KSP90]                    | 99.9               | 9.4E-25 | tail tube protein [ <i>Enterobacteria</i><br>phage T4 sensu lato]                              | 99.9              | 14              |



|    |   |       |       |      |                                           |                                                                                           |      |         |                                                                                               |      |    |
|----|---|-------|-------|------|-------------------------------------------|-------------------------------------------------------------------------------------------|------|---------|-----------------------------------------------------------------------------------------------|------|----|
| 46 | + | 29669 | 29842 | 50   | baseplate hub<br>assembly protein         | baseplate hub assembly protein<br>[ <i>Enterobacteria</i> phage T4]                       | 97.1 | 9.7E-04 |                                                                                               |      |    |
| 48 | + | 32965 | 35940 | 991  | lysozyme murein                           | no hit                                                                                    |      |         | lysozyme murein<br>[ <i>Staphylococcus aureus</i> subsp.<br><i>aureus</i> Mu50]               | 92.1 | 29 |
| 49 | + | 35947 | 37284 | 445  | tail protein                              | baseplate central spike complex<br>protein [ <i>Enterobacteria</i> phage<br>T4]           | 100  | 2.7E-35 | tail protein [ <i>Neisseria</i><br><i>meningitidis</i> MC58]                                  | 98.2 | 16 |
| 54 | + | 41336 | 41587 | 83   | YefM-like antitoxin                       | YefM-like antitoxin<br>[ <i>Escherichia coli</i> ]                                        | 92.4 | 2.3     | no hit                                                                                        |      |    |
| 56 | + | 42086 | 42304 | 72   | transcription<br>elongation factor        | transcription elongation factor<br>SPT5 [ <i>Homo sapiens</i> ]                           | 95.3 | 7.2E-02 | no hit                                                                                        |      |    |
| 63 | + | 48880 | 52569 | 1229 | lyase                                     | no hit                                                                                    |      |         | lyase [ <i>Bacteroides</i><br><i>thetaiotaomicron</i> ]                                       | 96   | 24 |
| 67 | + | 55301 | 56104 | 267  | tail fiber protein                        | tail fiber protein [ <i>Acanthamoeba</i><br><i>polyphaga</i> mimivirus]                   | 97   | 6.3E-02 | no hit                                                                                        |      |    |
| 68 | + | 56135 | 56623 | 162  | stress response<br>protein                | stress response protein [ <i>Bacillus</i><br>phage SPbeta]                                | 98   | 1.7E-05 | no hit                                                                                        |      |    |
| 70 | + | 58331 | 59068 | 245  | dUTPase                                   | deoxyuridine 5'-triphosphate<br>nucleotidohydrolase (dUTPase)<br>[ <i>Vaccinia</i> virus] | 98   | 1.9E-03 | deoxyuridine 5'-triphosphate<br>nucleotidohydrolase [ <i>Chlorella</i><br><i>variabilis</i> ] | 94.5 | 20 |
| 73 | + | 59891 | 60673 | 260  | 2OG-Fe(II)<br>oxygenase family<br>protein | 2OG-Fe(II) oxygenase<br>superfamily [Green alga]                                          | 96.6 | 4E-02   | no hit                                                                                        |      |    |
| 77 | + | 62486 | 63052 | 188  | 2OG-Fe(II)<br>oxygenase family            | 2OG-Fe(II) oxygenase<br>superfamily [ <i>Shewanella baltica</i> ]                         | 99.7 | 1.4E-15 | transmembrane prolyl 4-<br>hydroxylase [ <i>Homo sapiens</i> ]                                | 97.9 | 20 |

|     |   |       |       |     |                                           |                                                                                           |       |         |                                                                                                                                |      |    |
|-----|---|-------|-------|-----|-------------------------------------------|-------------------------------------------------------------------------------------------|-------|---------|--------------------------------------------------------------------------------------------------------------------------------|------|----|
|     |   |       |       |     | protein                                   | OS155]                                                                                    |       |         |                                                                                                                                |      |    |
| 78  | + | 63049 | 63666 | 205 | 2OG-Fe(II)<br>oxygenase family<br>protein | 2OG-Fe(II) oxygenase<br>superfamily [ <i>Chlamydomonas<br/>reinhardtii</i> ]              | 98.6  | 2.1E-06 | transmembrane prolyl 4-<br>hydroxylase [ <i>Homo sapiens</i> ]                                                                 | 96.2 | 22 |
| 79  | + | 63663 | 64256 | 197 | 2OG-Fe(II)<br>oxygenase family<br>protein | 2OG-Fe(II) oxygenase<br>superfamily [Green alga]                                          | 99.8  | 2.5E-16 | prolyl-4 hydroxylase [ <i>Homo<br/>sapiens</i> ]                                                                               | 99.8 | 19 |
| 80  | + | 64253 | 64780 | 175 | 2OG-Fe(II)<br>oxygenase family<br>protein | 2OG-Fe(II) oxygenase family<br>protein [ <i>Streptomyces<br/>viridochromogenes</i> Tue57] | 99.7  | 3.2E-15 | oxidoreductase activity<br>Fe(II)/(alpha)ketoglutarate-<br>dependent dioxygenase<br>[ <i>Aspergillus stellatus</i> ]           | 94.3 | 19 |
| 86  | + | 65930 | 66115 | 61  | transmembrane<br>protein                  | transmembrane protein<br>[ <i>Invertebrate iridescent virus 6</i> ]                       | 94.2  | 1.4     | no hit                                                                                                                         |      |    |
| 98  | + | 69444 | 69671 | 75  | high potential iron-<br>sulfur protein    | high potential iron-sulfur protein<br>[ <i>Rhodocyclus tenuis</i> ]                       | 93    | 1.9E-01 | no hit                                                                                                                         |      |    |
| 106 | + | 71163 | 71441 | 103 | TacA-like antitoxin                       | TacA antitoxin peptide<br>[ <i>Salmonella typhimurium</i> ]                               | 98.7  | 8.4E-08 | TacT2 toxin bound to TacA2<br>antitoxin [ <i>Salmonella enterica</i><br>subsp. <i>enterica</i> serovar<br><i>Typhimurium</i> ] | 95.9 | 32 |
| 112 | + | 72714 | 73007 | 97  | cadherin                                  | cadherin [ <i>Mus musculus</i> ]                                                          | 90.3  | 3.2     | no hit                                                                                                                         |      |    |
| 119 | + | 75456 | 75641 | 61  | holin-like protein                        | holin-like protein [ <i>Bacillus<br/>phage SPP1</i> ]                                     | 93.17 | 7.9E-01 |                                                                                                                                |      |    |
| 134 | + | 82293 | 82499 | 68  | transmembrane<br>protein                  | transmembrane protein<br>[ <i>Invertebrate iridescent virus</i> ]                         | 95    | 5.3E-01 | no hit                                                                                                                         |      |    |

|     |   |            |            |      |                                           |                                                                     |      |         |                                               |      |    |
|-----|---|------------|------------|------|-------------------------------------------|---------------------------------------------------------------------|------|---------|-----------------------------------------------|------|----|
| 151 | + | 88076      | 88393      | 105  | genomic DNA translation                   | genomic DNA translation [Bacillus phage SP01]                       | 97.6 | 1.5E-03 | no hit                                        |      |    |
| 155 | + | 89516      | 89680      | 54   | MazE-like antitoxin                       | MazE antitoxin [Escherichia coli]                                   | 99.2 | 8.2E-10 | no hit                                        |      |    |
| 156 | + | 89733      | 90080      | 115  | spike glycoprotein                        | spike glycoprotein [Human coronavirus 229E]                         | 93.4 | 1.4     | no hit                                        |      |    |
| 157 | + | 90084      | 94295      | 1403 | lipoprotein lipase                        | no hit                                                              |      |         | lipoprotein lipase [Homo sapiens]             | 81.3 | 30 |
| 169 | + | 12849<br>5 | 12873<br>7 | 80   | heat shock protein (Hsp)                  | heat shock protein [Methanothermobacter thermautotrophicus]         | 94.1 | 1.7     | no hit                                        |      |    |
| 170 | + | 12872<br>7 | 12892<br>4 | 65   | transmembrane signaling receptor activity | transmembrane signaling receptor activity [Drosophila melanogaster] | 93.9 | 2.4E-01 | signaling protein [Drosophila melanogaster]   | 88   | 56 |
| 176 | + | 13675<br>6 | 13728<br>0 | 174  | ubiquitin-like modifier-activating enzyme | ubiquitin-like modifier-activating enzyme [Mus musculus]            | 94.6 | 7.9E-01 | no hit                                        |      |    |
| 185 | + | 14575<br>5 | 14592<br>2 | 55   | prehead core component                    | prehead core component [Enterobacteria phage T4]                    | 97.2 | 3.5E-03 | no hit                                        |      |    |
| 195 | + | 15374<br>5 | 15399<br>6 | 83   | import protein                            | import protein [Plasmodium falciparum 3D7]                          | 96.7 | 7.1E-02 | no hit                                        |      |    |
| 197 | + | 15592<br>9 | 15807<br>0 | 713  | RNA binding protein                       | nucleic acid-binding proteins [Saccharomyces cerevisiae]            | 99.4 | 8.2E-12 | RNA binding protein [Deinococcus radiodurans] | 98.3 | 20 |
| 200 | + | 16021<br>3 | 16052<br>1 | 102  | nucleotide kinase                         | nucleotide kinase [Escherichia phage T7]                            | 99.6 | 2.5E-15 | no hit                                        |      |    |

|     |   |            |            |     |                              |                                                                                                                             |      |         |        |
|-----|---|------------|------------|-----|------------------------------|-----------------------------------------------------------------------------------------------------------------------------|------|---------|--------|
| 203 | + | 16217<br>1 | 16322<br>9 | 352 | iron-binding protein         | iron-binding protein that<br>performs methylcarbamoylation<br>of adenine using acetyl CoA<br>[ <i>Escherichia</i> phage Mu] | 99.1 | 9.4E-10 | no hit |
| 210 | + | 16543<br>1 | 16566<br>1 | 76  | transcriptional<br>repressor | transcriptional repressor<br>[ <i>Salmonella</i> bacteriophage P22]                                                         | 93.9 | 7.7E-01 | no hit |

<sup>a</sup>Putative functions are predicted based on functions of homologs identified using HHpred and Phyre2 search.

Table S3. Amino acid sequence identities among the S-CREM1 2OG-Fe(II) oxygenase family proteins.

[illegible]

Table S4. tRNA genes in the S-CREM1 genome.

| <b>tRNA gene</b> | <b>Positions</b> | <b>Strand</b> | <b>Attribute</b> | <b>Anticodon</b> |
|------------------|------------------|---------------|------------------|------------------|
| tRNA1            | 9057–9129        | +             | Arg              | TCT              |
| tRNA2            | 9890–9961        | +             | Met              | CAT              |
| tRNA3            | 10132–10213      | +             | Leu              | TAG              |
| tRNA4            | 10429–10501      | +             | Asn              | GTT              |
| tRNA5            | 10572–10643      | +             | Gly              | TCC              |
| tRNA6            | 10961–11032      | +             | Ile              | TAT              |
| tRNA7            | 17937–18024      | +             | Ser              | TGA              |
| tRNA8            | 18025–18098      | +             | Pro              | TGG              |
| tRNA9            | 37980–38051      | +             | Val              | TAC              |
| tRNA10           | 41628–41700      | +             | Leu              | TAA              |
| tRNA11           | 42581–42653      | +             | Thr              | TGT              |
| tRNA12           | 43886–43958      | +             | Lys              | TTT              |
| tRNA13           | 43998–44079      | +             | Tyr              | GTA              |
| tRNA14           | 44084–44155      | +             | Asp              | GTC              |
| tRNA15           | 44331–44402      | +             | Glu              | TTC              |
| tRNA16           | 44406–44478      | +             | Phe              | GAA              |
| tRNA17           | 44576–44648      | +             | Ile              | GAT              |
| tRNA18           | 44703–44792      | +             | Ser              | GCT              |
| tRNA19           | 44796–44869      | +             | Met              | CAT              |
| tRNA20           | 44871–44941      | +             | His              | GTG              |
| tRNA21           | 44946–45016      | +             | Gln              | TTG              |
| tRNA22           | 45020–45091      | +             | Trp              | CCA              |
| tRNA23           | 45095–45168      | +             | Arg              | ACG              |
| tRNA24           | 155776–155848    | +             | Ala              | TGC              |

Table S5. Information of cyanophages with tRNA genes more than twenty.

| Phage strain | Host                                        | Isolation source                        | Bona fide tRNA No. | Amino acid specificities | GenBank accession No. | Reference  |
|--------------|---------------------------------------------|-----------------------------------------|--------------------|--------------------------|-----------------------|------------|
| S-CREM1      | <i>Synechococcus</i> sp. CB0101             | Changjiang River Estuary, surface water | 24                 | 19                       | OP535465              | This study |
| S-CBWM1      | <i>Synechococcus</i> sp. CBW1002            | Baltimore Inner Harbor, surface water   | 34                 | 20                       | MG450654              | [22]       |
| S-CRM01      | <i>Synechococcus</i> sp. LC16               | Copco Reservoir, Klamath River          | 33                 | 20                       | HQ615693              | [23]       |
| S-PM2        | <i>Synechococcus</i> sp. WH <sub>7803</sub> | English Channel, 0 m                    | 23                 | 18                       | AJ630128              | [24]       |

Table S6. Comparison of tRNA complementary codons among cyanophages with  
tRNA genes more than twenty.

| Attribute | Anticodon |       |         |         |
|-----------|-----------|-------|---------|---------|
|           | S-CREM1   | S-PM2 | S-CBWM1 | S-CRM01 |
| Arg       | ACG       | ACG   | ACG     | ACG     |
| Met       | CAT*      | CAT** | CAT*    | CAT**   |
| Trp       | CCA       | CCA   | CCA     | CCA     |
| Ile       | GAT       | GAT   | GAT     | GAT*    |
| Ser       | GCT       | GCT   | GCT     | GCT     |
| Tyr       | GTA       | GTA   | GTA     | GTA     |
| Asp       | GTC       | GTC   | GTC     | GTC     |
| His       | GTG       | GTG   | GTG     | GTG     |
| Asn       | GTT       | GTT   | GTT     | GTT     |
| Leu       | TAA       | TAA   | TAA     | TAA     |
| Val       | TAC       | TAC   | TAC     | TAC     |
| Gly       | TCC       | TCC   | TCC     | TCC     |
| Arg       | TCT       | TCT   | TCT     | TCT     |
| Ala       | TGC       | TGC   | TGC     | TGC     |
| Pro       | TGG       | TGG   | TGG     | TGG*    |
| Thr       | TGT       | TGT   | TGT     | TGT     |
| Glu       | TTC       | TTC   | TTC*    | TTC     |
| Gln       | TTG       | TTG   | TTG     | TTG     |
| Lys       | TTT       | TTT   | TTT     | TTT     |
| Leu       | TAG       | TAG   | TAG     | -       |
| Phe       | GAA       | -     | GAA     | GAA     |
| Ile       | TAT       | TAT   | -       | -       |
| Ser       | TGA       | -     | -       | -       |
| Ser       | -         | GGA   | -       | GGA     |
| Leu       | -         | -     | CAA     | CAA     |
| Lys       | -         | -     | CTT     | CTT     |
| Val       | -         | -     | GAC     | GAC     |
| Leu       | -         | -     | GAG     | GAG     |
| Cys       | -         | -     | GCA     | GCA     |
| Gly       | -         | -     | GCC     | GCC     |
| Thr       | -         | -     | GGT     | GGT     |
| Arg       | -         | -     | CCT     | -       |
| Thr       | -         | -     | CGT     | -       |
| Gln       | -         | -     | CTG     | -       |
| Arg       | -         | -     | TCG     | -       |
| Glu       | -         | -     | -       | CTC     |

\*tRNA genes with specific anticodons found twice in the genome.

\*\*tRNA genes with specific anticodons found thrice in the genome.



Table S7. *wcaG*, *manA*, and *glnA* cis-regulatory RNA genes found in cyanophages.

| Feature     | Cyanophage strain <sup>a</sup>            | Stand | Start  | End    | Score |
|-------------|-------------------------------------------|-------|--------|--------|-------|
| <i>wcaG</i> | <i>Synechococcus</i> phage S-CREM1        | +     | 9745   | 9842   | 91    |
|             | <i>Synechococcus</i> phage S-IOM18        | +     | 148008 | 148102 | 93.7  |
|             | <i>Synechococcus</i> phage S-SM2          | +     | 143437 | 143532 | 91.8  |
|             | <i>Synechococcus</i> phage S-RSM4         | -     | 29718  | 29624  | 89.6  |
|             | <i>Synechococcus</i> phage S-WAM2         | +     | 160619 | 160713 | 89.6  |
|             | Cyanophage S-RIM32                        | +     | 169365 | 169460 | 89.2  |
|             | <i>Synechococcus</i> phage S-SKS1         | -     | 48688  | 48591  | 88.9  |
|             | <i>Synechococcus</i> phage S-CAM1         | -     | 106335 | 106239 | 83.9  |
|             | <i>Synechococcus</i> phage S-CAM3         | +     | 186780 | 186877 | 82.5  |
|             | <i>Synechococcus</i> phage syn9           | +     | 163184 | 163278 | 77.9  |
|             | <i>Synechococcus</i> phage S-CAM7         | +     | 161007 | 161102 | 77.4  |
|             | <i>Synechococcus</i> phage S-PM2          | +     | 122806 | 122905 | 71.1  |
|             | <i>Synechococcus</i> phage S-RIM8 A.HR1   | +     | 157556 | 157661 | 62.5  |
|             | Cyanophage S-RIM50                        | +     | 160772 | 160877 | 62.5  |
|             | <i>Synechococcus</i> phage ACG-2014e      | +     | 156760 | 156858 | 58.8  |
|             | <i>Synechococcus</i> phage S-RIM2 R1_1999 | +     | 162743 | 162837 | 58    |
|             | <i>Synechococcus</i> phage S-CAM22        | +     | 157433 | 157531 | 50.1  |
|             | <i>Synechococcus</i> phage ACG-2014h      | +     | 155033 | 155127 | 49.8  |
|             | <i>Prochlorococcus</i> phage Syn1         | +     | 167073 | 167166 | 44.2  |
|             | <i>Synechococcus</i> phage ACG-2014h      | +     | 155137 | 155239 | 43.1  |
| <i>manA</i> | <i>Prochlorococcus</i> phage Syn1         | +     | 167176 | 167284 | 42.4  |
|             | <i>Synechococcus</i> phage S-SCSM1        | +     | 107200 | 107286 | 37.1  |
|             | <i>Synechococcus</i> phage S-CREM1        | +     | 10215  | 10429  | 100.6 |
|             | Cyanophage P-RSM6                         | -     | 14255  | 14070  | 173.2 |
|             | <i>Synechococcus</i> phage metaG-MbCM1    | +     | 113853 | 114040 | 173.1 |
|             | <i>Prochlorococcus</i> phage P-SSM2       | +     | 142837 | 143034 | 171.3 |
|             | <i>Prochlorococcus</i> phage P-HM1        | +     | 112740 | 112927 | 170.7 |
|             | <i>Prochlorococcus</i> phage P-SSM4       | +     | 164829 | 165014 | 168.7 |
|             | <i>Prochlorococcus</i> phage P-TIM68      | +     | 152799 | 152994 | 166.3 |
|             | <i>Prochlorococcus</i> phage P-SSM7       | +     | 171456 | 171649 | 165.4 |
|             | <i>Prochlorococcus</i> phage P-RSM4       | +     | 120783 | 120974 | 161.2 |
|             | <i>Prochlorococcus</i> phage P-HM2        | +     | 4771   | 4969   | 160.4 |
|             | <i>Synechococcus</i> phage S-SSM5         | +     | 116393 | 116586 | 160.1 |
|             | Cyanophage P-TIM40                        | +     | 169071 | 169265 | 136.9 |
|             | Cyanophage P-RSM1                         | -     | 121342 | 121143 | 126.1 |
|             | Cyanophage S-SSM4                         | +     | 130075 | 130274 | 122.9 |
|             | <i>Synechococcus</i> phage S-SSM7         | +     | 151363 | 151563 | 122.8 |
|             | <i>Synechococcus</i> phage ACG-2014f      | +     | 128566 | 128776 | 91.4  |
| <i>glnA</i> | <i>Synechococcus</i> phage S-CREM1        | -     | 164330 | 164232 | 44    |
|             | <i>Prochlorococcus</i> phage P-TIM68      | +     | 193968 | 194062 | 46.7  |
|             | <i>Synechococcus</i> phage ACG-2014f      | +     | 213517 | 213608 | 44.9  |
|             | <i>Synechococcus</i> phage S-PM2          | +     | 142315 | 142415 | 43.3  |

|                                   |   |        |        |      |
|-----------------------------------|---|--------|--------|------|
| <i>Synechococcus</i> phage S-ShM2 | + | 162519 | 162753 | 42.7 |
|-----------------------------------|---|--------|--------|------|

<sup>a</sup>*cis*-regulatory RNA genes in the S-CREM1 genome were predicted by searching against the Rfam database. Information of *cis*-regulatory RNA genes of other cyanophages were obtained from the Rfam database.

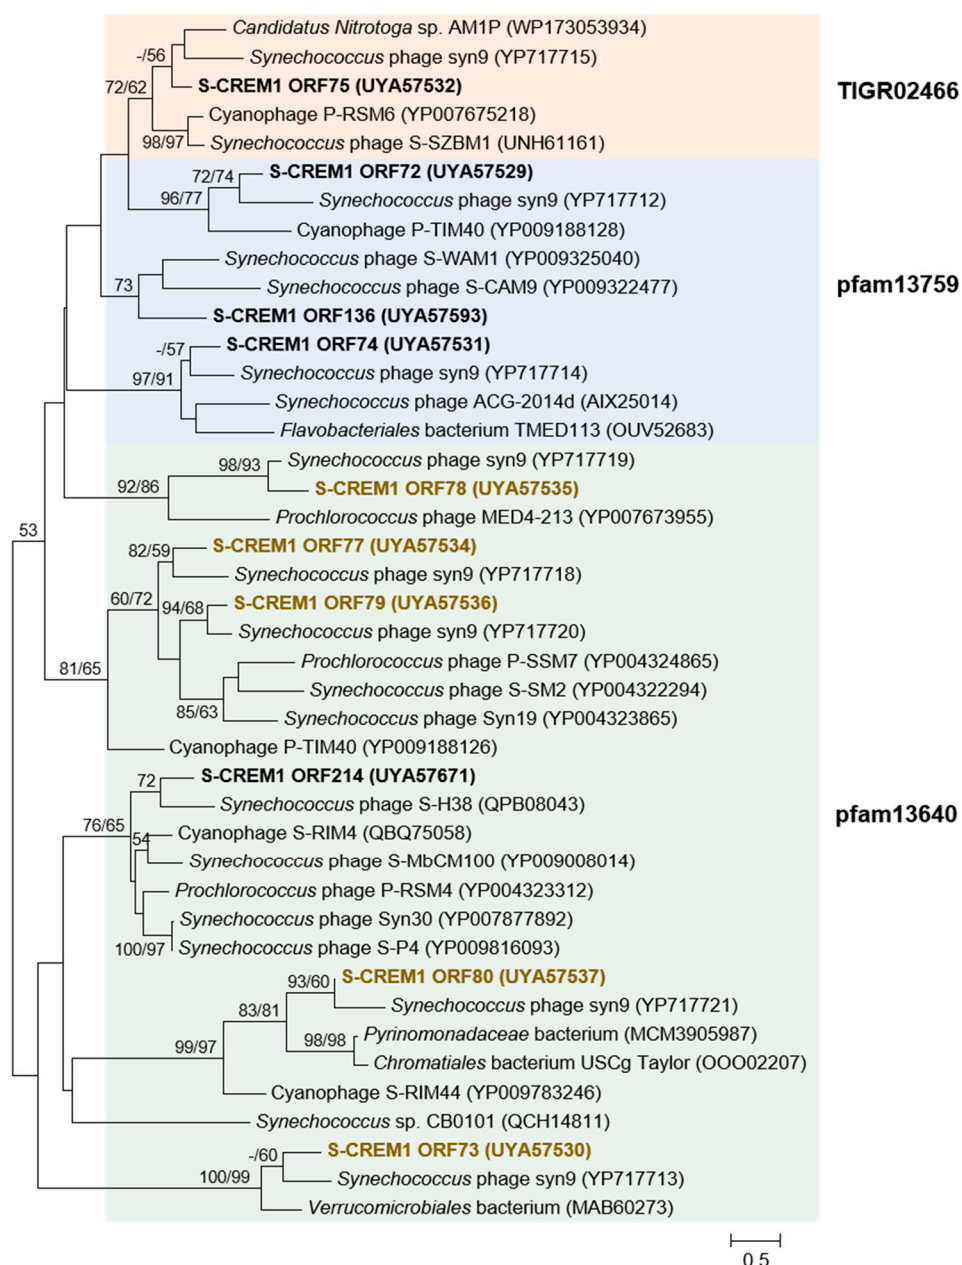

Figure S1. Unrooted maximum likelihood phylogenetic tree of the S-CREM1 predicted 2OG-Fe(II) oxygenase superfamily proteins. ORFs in brown font were identified based on predicted structural properties using HHpred and Phyre analyses. Bootstrap values (maximum-likelihood/neighbor-joining) are based on 1,000 replicates, and only values > 50% are shown.

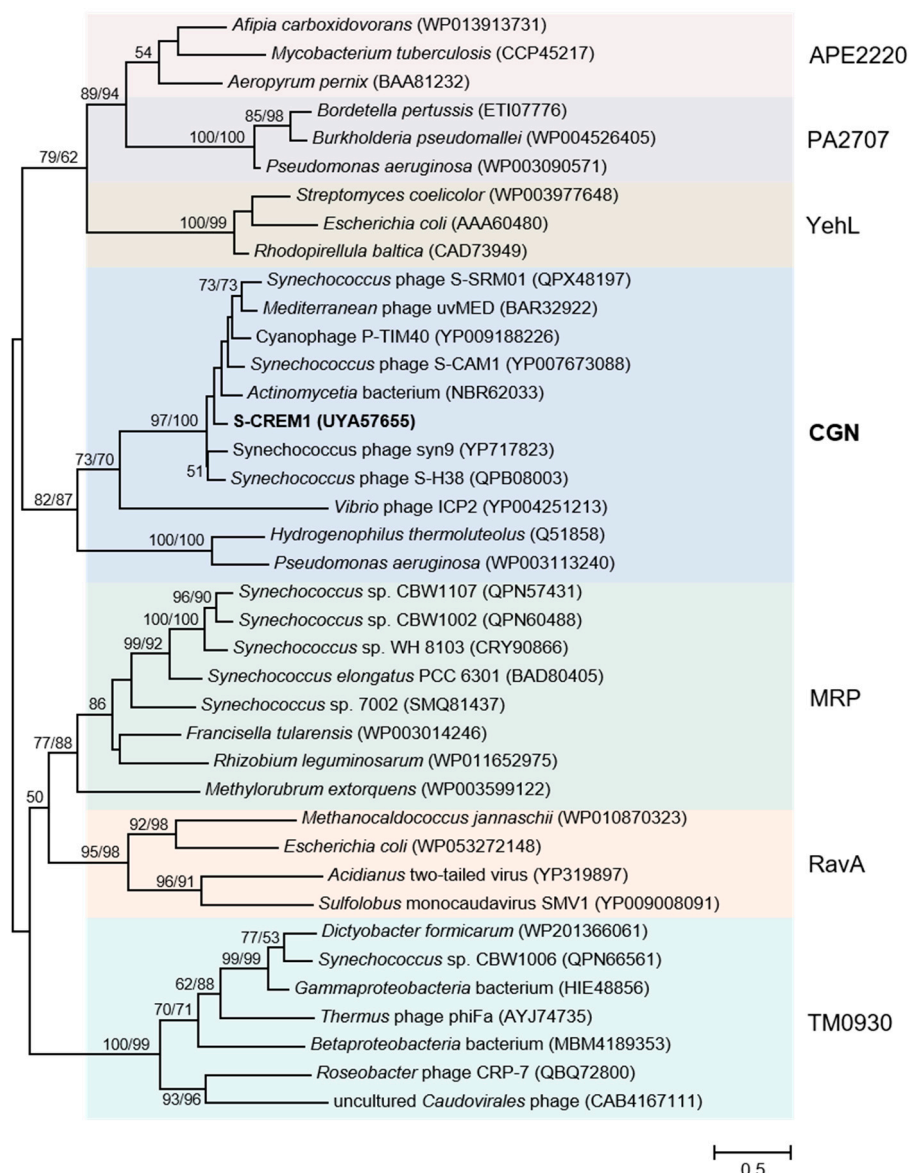

Figure S2. Unrooted maximum likelihood phylogenetic tree of the MoxR ATPases. The number of bootstrap replicates = 1,000. The bootstrap values (maximum-likelihood/neighbor-joining) are shown near each node, and only values > 50% are shown.

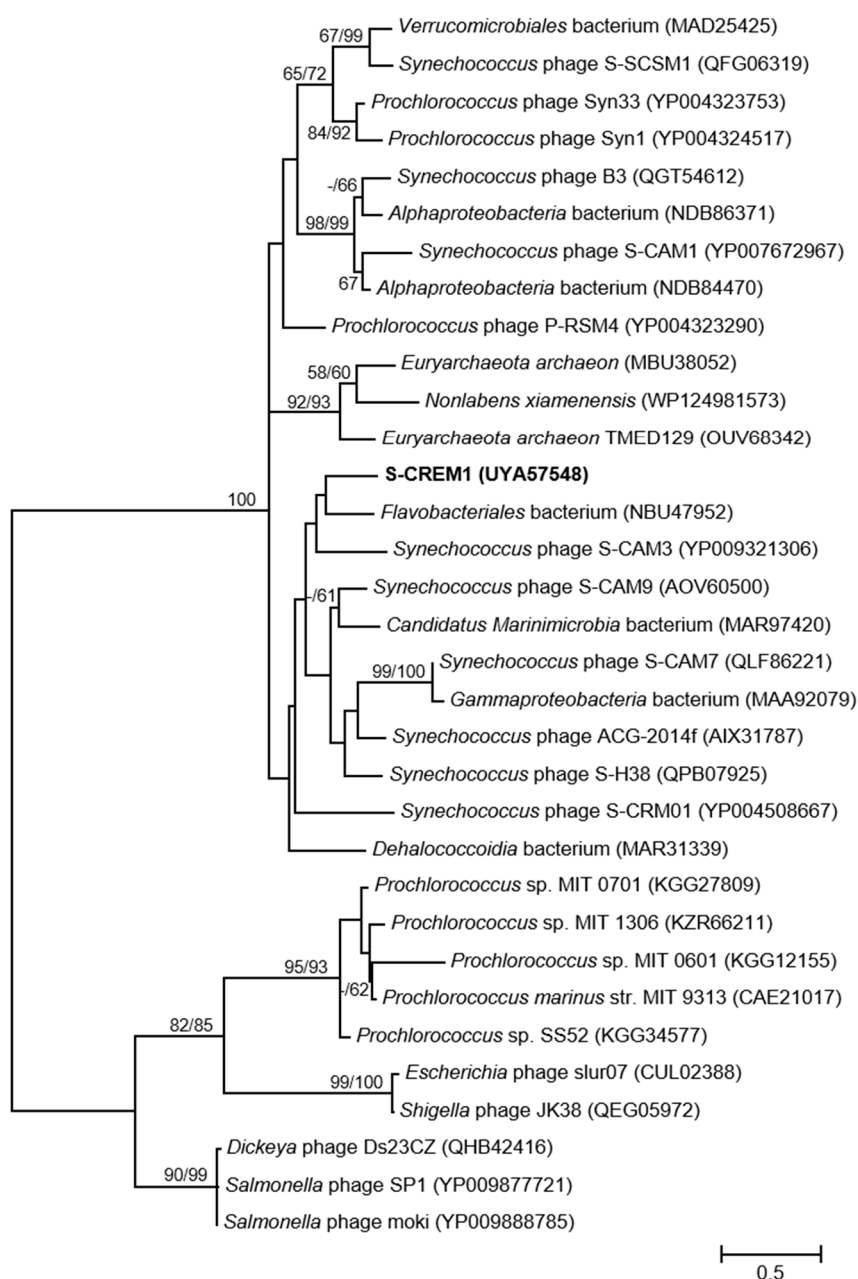

Figure S3. Unrooted maximum-likelihood phylogenetic tree of the S-CREM1 pyrimidine dimer DNA glycosylase. The bootstrap values (maximum-likelihood/neighbor-joining) of > 50% are shown near each node. The number of bootstrap replicates = 1,000.

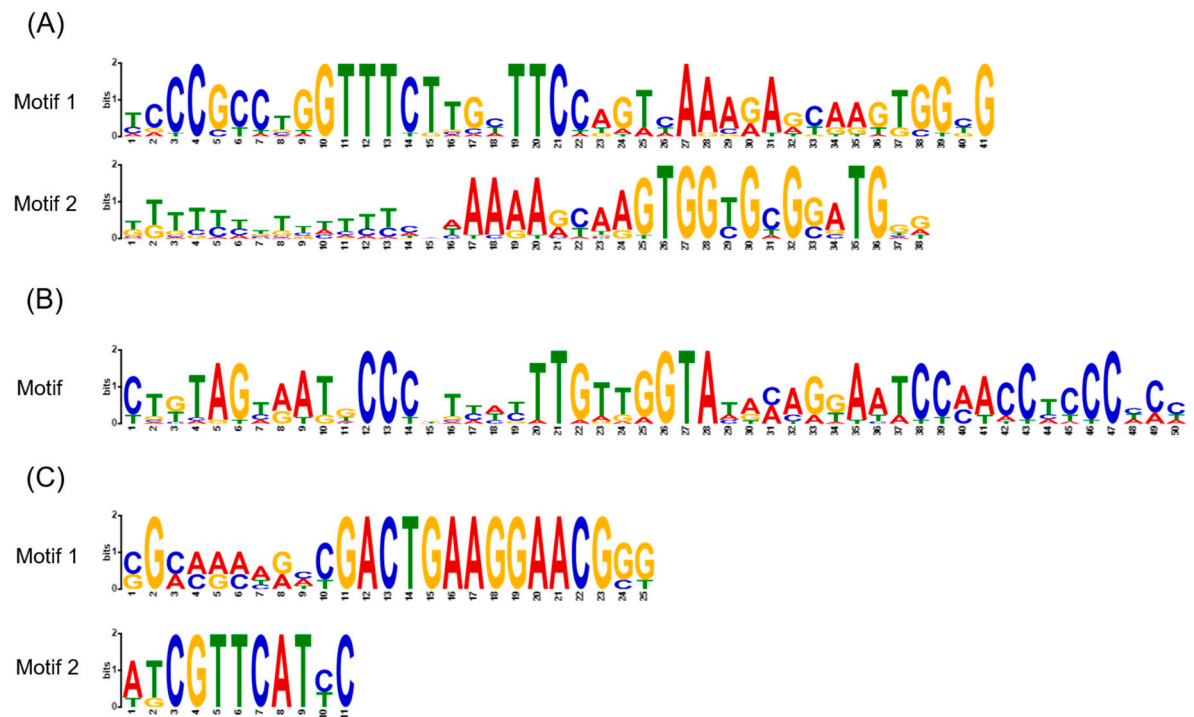

Figure S4. DNA sequence conserved motifs in *wcaG* (A), *manA* (B), and *glnA* (C) *cis*-regulatory RNA genes among S-CREM1 and other cyanophages in the Rfam database.
